# Supplementary material for: Activation-oxidation on binary CuFe oxides for highly selective electrocatalytic oxidation of benzyl alcohol to benzaldehyde
Source: Royal Society of Chemistry journal article supplement (doi:10.1039/d5cy00868a), 2025-01-01
Supplement: d5cy00868a1.pdf [file d5cy00868a1.pdf]

## Supplemental Information

### **Activation-oxidation on binary CuFe oxides for highly selective electrocatalytic oxidation of benzyl alcohol to benzaldehyde**

Yingjie Mei, ‡<sup>a</sup> Linbo Jin, ‡<sup>a</sup> Zhouqing Gu,<sup>a</sup> Xiaoming Sun,<sup>a</sup> and Daojin Zhou\*<sup>a</sup>

*<sup>a</sup>State Key Laboratory of Chemical Resource Engineering, College of Chemistry, Beijing  
University of Chemical Technology, Beijing, 100029, China.*

\*E-mail: zhoudj@mail.buct.edu.cn

## Experimental Section

**Chemicals:** The chemicals used in this work are Copper chloride ( $\text{CuCl}_2 \cdot 2\text{H}_2\text{O}$ , 99.9%), Ferrous sulfate ( $\text{FeSO}_4 \cdot 7\text{H}_2\text{O}$ , 99.9%), Ferric nitrate ( $\text{Fe}(\text{NO}_3)_3 \cdot 9\text{H}_2\text{O}$ , 99.9%), Sodium sulfite ( $\text{Na}_2\text{SO}_3$ , 99.9%), Sodium hydroxide ( $\text{NaOH}$ , 99.9%) and Potassium hydroxide ( $\text{KOH}$ , 99.9%), which were purchased from Aladdin Biological Technology. Benzyl alcohol ( $\text{C}_7\text{H}_7\text{OH}$ , 99.9%) was purchased from Energy Chemical. 2, 2, 6, 6-tetramethylpiperidine oxide (TEMPO, 99%), Ethanol ( $\text{C}_2\text{H}_5\text{OH}$ , 99.9%) and Nafion solution (5wt%) were purchased from Sigma Aldrich. Hydrophilic carbon paper (TGP-H-060) was purchased from Toray Industries. All water used here is deionized water.

**Preparation of Cu and Fe hydroxide precursors:** We used double-droplet methods to get co-precipitated copper and iron hydroxides. 0.17 g  $\text{CuCl}_2 \cdot 2\text{H}_2\text{O}$  and 1.67 g  $\text{FeSO}_4 \cdot 7\text{H}_2\text{O}$  were dissolved in 30 mL  $\text{H}_2\text{O}$  as solution A, 0.6 g  $\text{NaOH}$  and 1.89 g  $\text{Na}_2\text{SO}_3$  were dissolved in 30 mL  $\text{H}_2\text{O}$  as solution B. The precursors  $\text{CuCl}_2 \cdot 2\text{H}_2\text{O}$  and  $\text{FeSO}_4 \cdot 7\text{H}_2\text{O}$  were used in a molar ratio of 1:6 ( $\text{Cu}^{2+}$ :  $\text{Fe}^{2+}$ ). Dripped A and B simultaneously into another beaker containing 50 mL  $\text{H}_2\text{O}$ , and observed the pH maintaining at about 8.5 while dripping. Stirred the solution for 4 hours at room temperature (the whole reaction process was passed through nitrogen) and the sample was washed with deionized water 3 times (centrifuge speed of 10000 r, 3 min) after the reaction. Then the precipitate was put into a vacuum freeze dryer for 12 hours to obtain a yellow-green powder, recorded as  $\text{CuFe}(\text{OH})_x$ .

**Preparation of CuFe bimetallic oxides:** The yellow-green powder was put into a porcelain boat and calcined at  $200^\circ\text{C}$  for 4 hours in 10%  $\text{H}_2/\text{Ar}$  mixture. The calcination was performed in a tube furnace under a 10%  $\text{H}_2/\text{Ar}$  (v/v) reducing atmosphere with a constant gas flow rate of  $100 \text{ mL min}^{-1}$ . The calcination temperature and time were varied to keep the heating rate at  $10^\circ\text{C} \cdot \text{min}^{-1}$  to obtain  $\text{CuFeO}_x$ , and the effects of calcination temperature and time on the catalyst properties were also investigated.

**Preparation of other samples:** Solution A only have  $\text{CuCl}_2 \cdot 2\text{H}_2\text{O}$  to get the comparison sample with  $\text{Cu}^{2+}$  as a precursor. Solution A only have  $\text{FeSO}_4 \cdot 7\text{H}_2\text{O}$  to get the comparison sample with  $\text{Fe}^{2+}$  as a precursor. The subsequent procedure remained unchanged. Changed  $\text{FeSO}_4 \cdot 7\text{H}_2\text{O}$  to  $\text{Fe}(\text{NO}_3)_3 \cdot 9\text{H}_2\text{O}$  in solution A to get the comparison sample with  $\text{Cu}^{2+}$  and  $\text{Fe}^{3+}$  as precursors.

**Characterizations:** X-ray diffraction (XRD) tests were performed on a Rigaku D/max 2500 X-ray diffractometer with  $\text{Cu K}\alpha$  radiation. The range of  $2\theta$  was from  $5^\circ$  to  $85^\circ$  and the scanning speed was  $5^\circ \cdot \text{min}^{-1}$ . The morphologies of the synthesized samples were characterized by scanning electron microscopy (SEM) on JEM 2100F. Characterization by transmission electron microscopy (TEM) were implemented by JEOL JEM 2100 and Cs-TEM FEI Titan G2, while samples were characterized by high-resolution transmission electron microscopy (HRTEM) using a double aberration-corrected field emission gun. The ESCALAB 250 was used to present X-ray photoelectron spectroscopy (XPS) tests on the catalysts.

**Electrochemical performance tests:** All tests were performed in a H-cell type electrolytic cell. In order to improve electrical conductivity and selectively, we added conductive carbon black and TEMPO.

Preparation of working electrode: ink consisted of 5 mg catalyst, 1 mg carbon black, 10  $\mu\text{L}$  Nafion and 1 mL ethanol, which was ultrasonically homogenized and then dripped onto  $1 \times 1 \text{ cm}^2$  hydrophilic carbon paper, resulting in a catalyst loading of  $5 \text{ mg cm}^{-2}$ . The counter electrode was carbon rod, the reference electrode was  $\text{Ag}/\text{AgCl}$  and

the electrolyte consisted of 1 M KOH with/without 0.1 M benzyl alcohol +0.8 mM TEMPO.

CV and LSV tests are used to determine the electrochemical activity of the catalyst. The working electrode was firstly activated in 1 M KOH for 20 revolutions with a sweep rate of  $50 \text{ mV}\cdot\text{s}^{-1}$  and the potential range is  $-0.2 \text{ V} \sim 0.8 \text{ V}$  (vs. Ag/AgCl), changing the sweep rate to  $5 \text{ mV}\cdot\text{s}^{-1}$  to obtain the CV and LSV curves of OER. Then change the electrolyte to run BAOR.

Electrochemical active surface area (ECSA) tests were all performed in 1 M KOH + 0.1 M benzyl alcohol +0.8 mM TEMPO electrolyte with a potential range of  $-0.1 \text{ V} \sim -0.05 \text{ V}$  (vs. Ag/AgCl) and sweep speeds were 20 mV/s, 40 mV/s, 60 mV/s, 80 mV/s, and 100 mV/s, respectively. The CV curves at different sweep speeds were obtained by varying the scanning speed in non-Faraday section, which in turn got the double layer capacitor ( $C_{dl}$ ) of the catalysts.

Electrochemical impedance spectroscopy (EIS) tests: The potential at a current density of  $10 \text{ mA}\cdot\text{cm}^{-2}$  was selected as the test potential with a frequency of  $10^5 \text{ Hz}$  to  $0.01 \text{ Hz}$  and an amplitude of 5 mV.

Chronoamperometry (CA) test and Cyclic stability: These tests were all performed in 1 M KOH + 0.1 M benzyl alcohol +0.8 mM TEMPO electrolyte.

Tests of activation energy ( $E_a$ ): Test temperatures were  $35^\circ\text{C}$ ,  $45^\circ\text{C}$ ,  $55^\circ\text{C}$ ,  $65^\circ\text{C}$ , electrolyte consisted of 1 M KOH + 0.1 M benzyl alcohol + 0.8 mM TEMPO, sweep rate was  $5 \text{ mV}\cdot\text{s}^{-1}$  and potential range was  $-0.2 \text{ V} \sim 0.8 \text{ V}$  (vs. Ag/AgCl). The formula is  $\text{Log } j = \text{Log } A - E_a / (2.3RT)$ .

**Product analysis:** The electrolyte was 1 M KOH + 0.1 M benzyl alcohol +0.8 mM TEMPO, and the solution components were analyzed by gas chromatography after 7200 s at different potential. The reacted solution was extracted into 20 mL of dichloromethane, and 100  $\mu\text{L}$  of light-yellow organic solution was obtained by spinning afterward. The electrolyte components were detected by using the differences in the boiling points of benzyl alcohol ( $204.7^\circ\text{C}$ ), benzaldehyde ( $179^\circ\text{C}$ ), and benzoic acid ( $249.2^\circ\text{C}$ ).

The quantitative analysis of benzyl alcohol (BA) and benzaldehyde (BAD) was performed on an Agilent 7890A gas chromatography system equipped with a flame ionization detector (FID) and a DB-WaxUI capillary column (5% phenyl polysiloxane,  $30 \text{ m} \times 0.25 \text{ mm} \times 0.25 \mu\text{m}$ ). High-purity nitrogen was used as the carrier gas at a constant flow rate of  $1.5 \text{ mL min}^{-1}$ . The injection volume was 0.5  $\mu\text{L}$  with a split ratio of 20:1. The oven temperature program was optimized as follows: initial temperature of  $60^\circ\text{C}$  held for 2 min, ramped to  $180^\circ\text{C}$  at a rate of  $20^\circ\text{C min}^{-1}$ , and then held at  $180^\circ\text{C}$  for 3 min. The injector and detector temperatures were set at  $220^\circ\text{C}$  and  $250^\circ\text{C}$ , respectively.

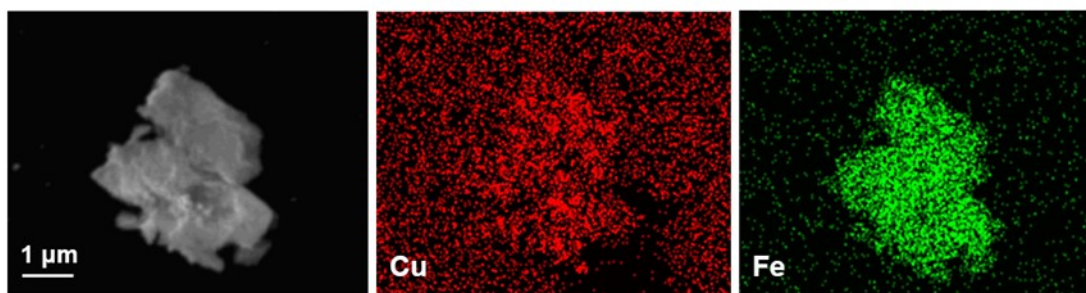

**Fig. S1** Elemental mapping of  $\text{CuFeO}_x$  catalyst (calcined at 200 °C for 4 h).

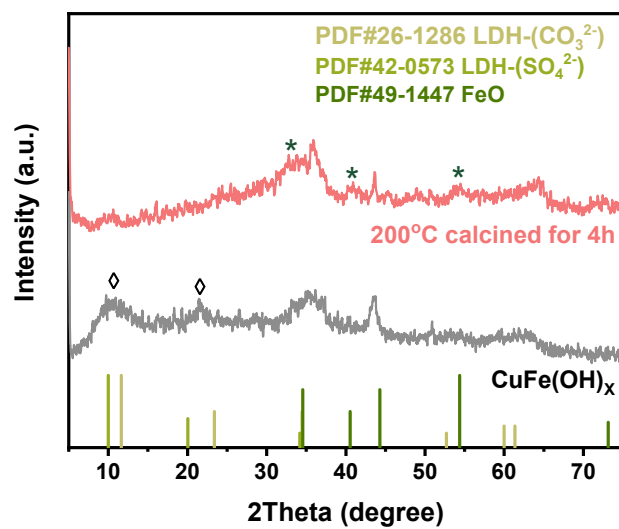

**Fig. S2** XRD pattern of catalysts (a) before and (b) after calcination in H<sub>2</sub>/Ar mixture atmosphere.

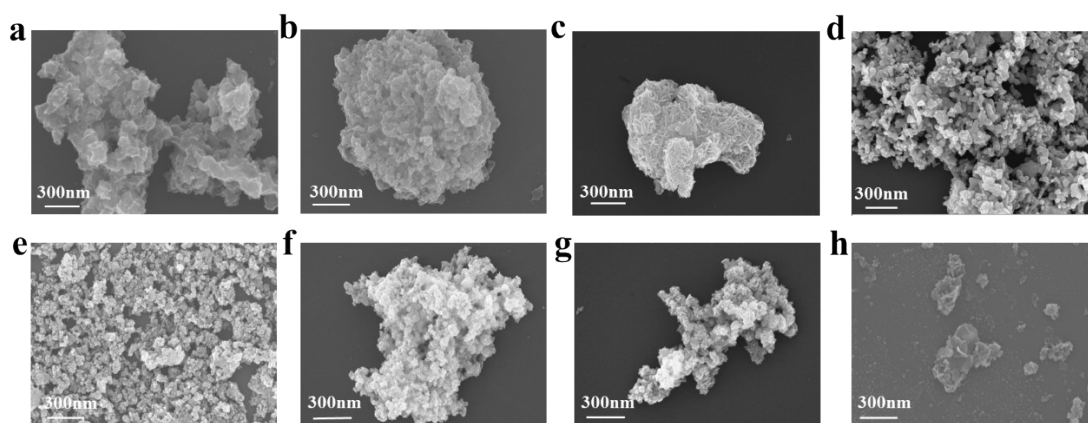

**Fig. S3** SEM images of the catalysts of different calcination temperatures and times. (a) 100°C 4 hours, (b) 200°C 4 hours, (c) 300°C 4 hours, (d) 400°C 4 hours, (e) 200°C 1 hours, (f) 200°C 2 hours, (g) 200°C 3 hours and (h) before calcination.

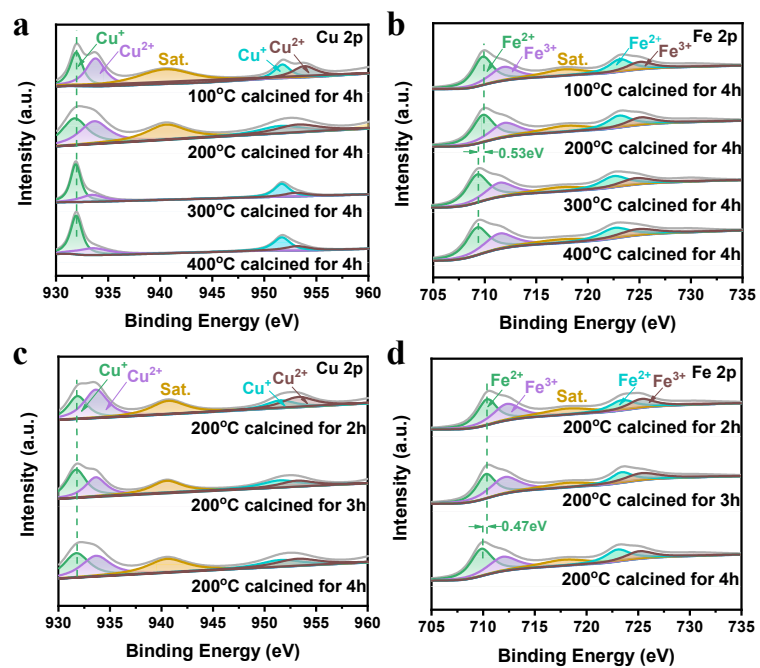

**Fig. S4** XPS spectra of the catalysts with different (a-b) calcination temperatures and (c-d) calcination times.

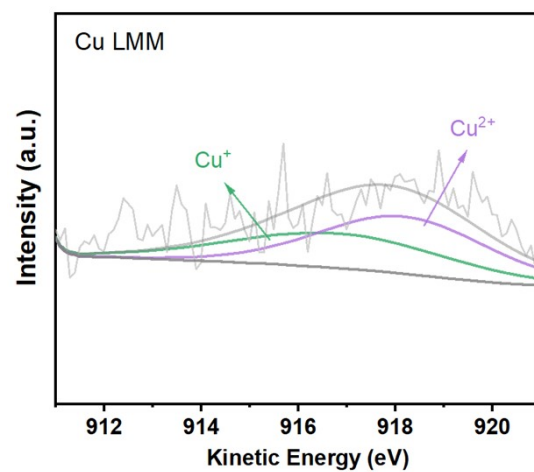

**Fig. S5** Cu LMM Auger Electron Spectroscopy of the CuFeO<sub>x</sub> catalyst.



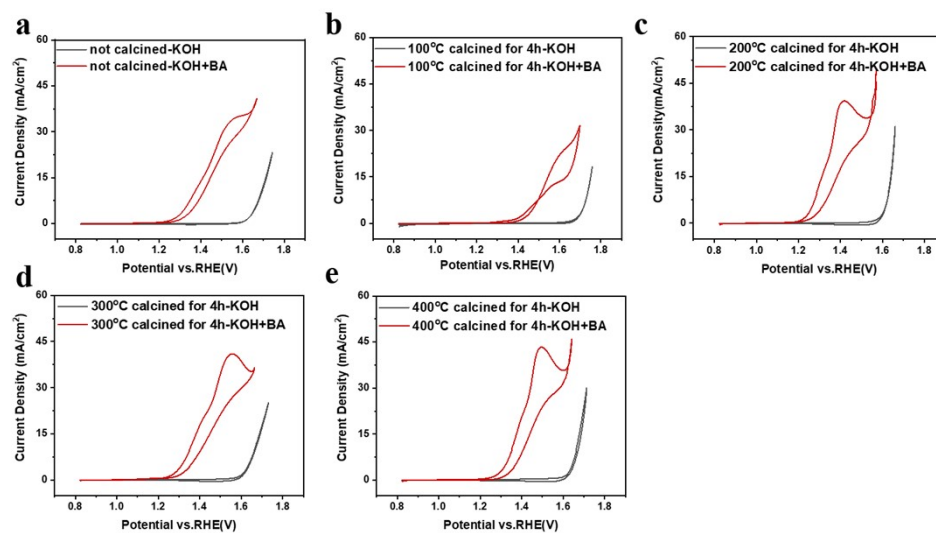

**Fig. S6** CV curves of catalysts at different calcination temperatures in 1 M KOH + 0.1 M BA solution.

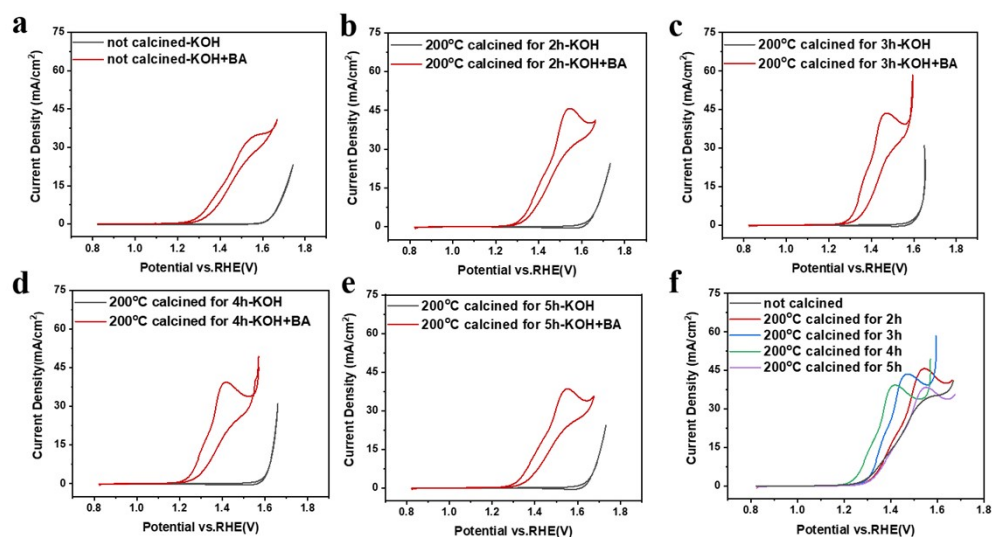

**Fig. S7** CV curves of catalysts at different calcination time in 1 M KOH + 0.1 M BA solution.

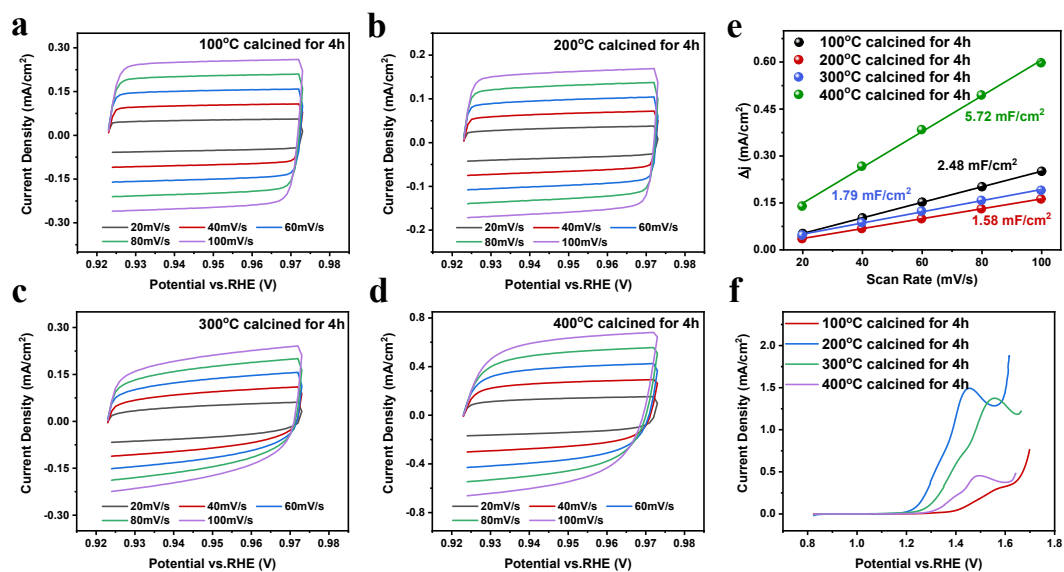

**Fig. S8** (a-e) Electrochemical active surface area of catalysts at different calcination temperatures in KOH+BA solution. (f) LSV curves after ECSA-normalized.

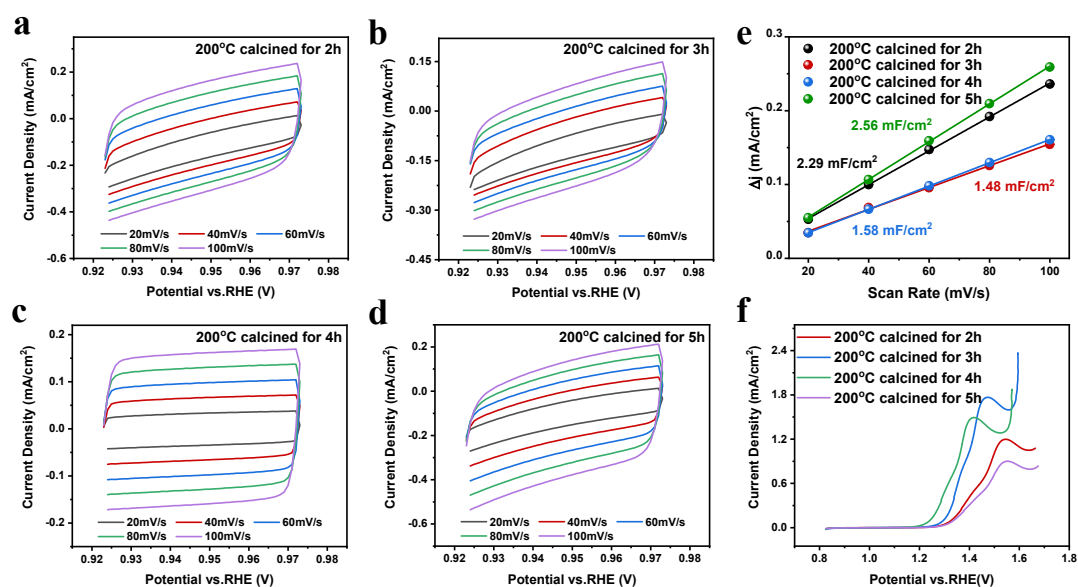

**Fig. S9** (a-e) Electrochemical active surface area of catalysts at different calcination time in KOH+BA solution. (f) LSV curve after ECSA-normalized.

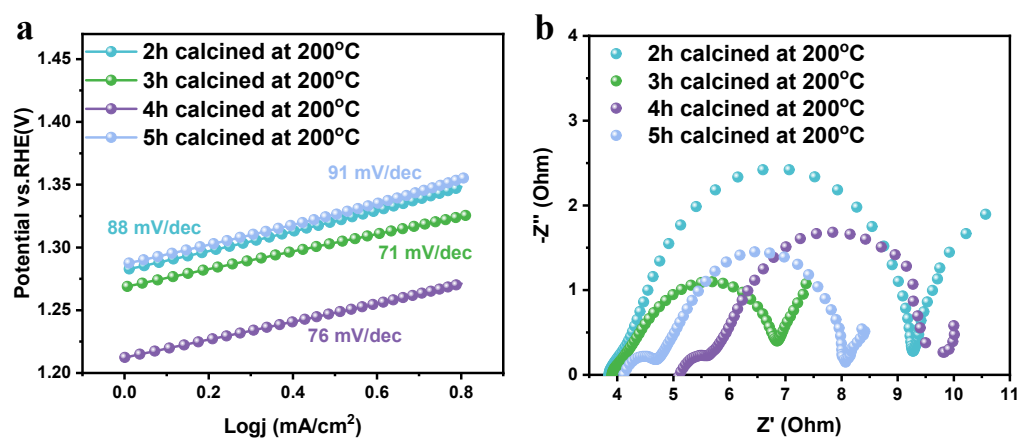

**Fig. S10** (a) Tafel slopes and (b) EIS of catalysts at different calcination temperatures in 1 M KOH+ 0.1 M BA solution.

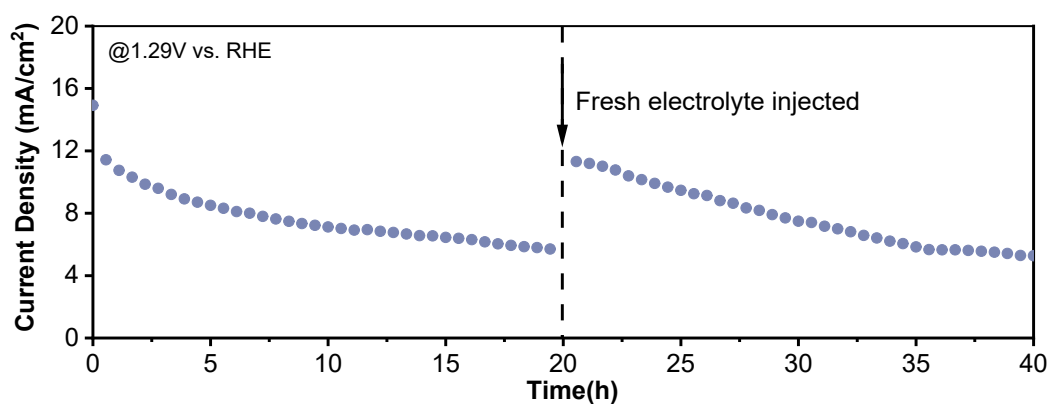

**Fig. S11** Long-term CA results at 1.29 V vs. RHE.

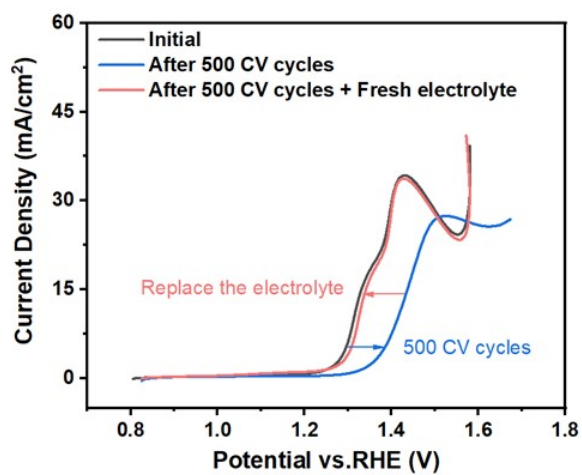

**Fig. S12** LSV curves of the  $\text{CuFeO}_x$  catalyst under different conditions: initial state, after the 500 CV cycles and after cycles with fresh electrolyte.

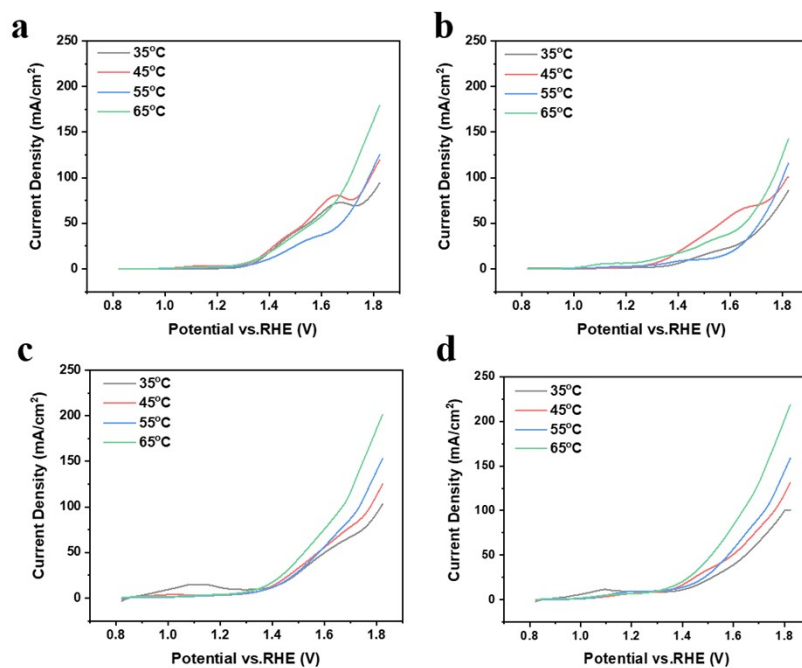

**Fig. S13** (a) 100°C for 4 hours, (b) 200°C for 4 hours, (c) 300°C for 4 hours and (d) 400°C for 4 hours are the LSV curves of the calcined catalyst under different test temperatures.

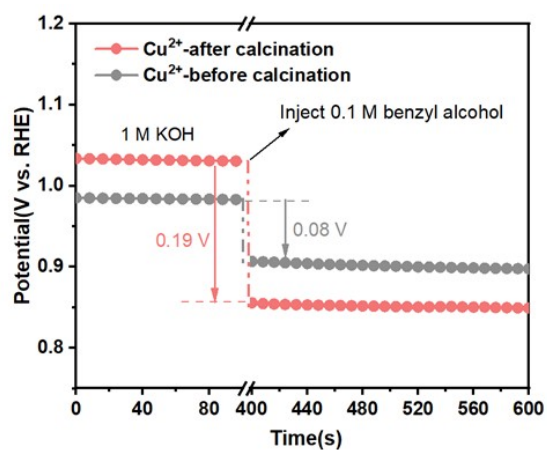

**Fig. S14** OCP curves of  $\text{Cu}^{2+}$ -after calcination and  $\text{Cu}^{2+}$ -before calcination in 1 M KOH and 0.1 M benzyl alcohol injected subsequently.

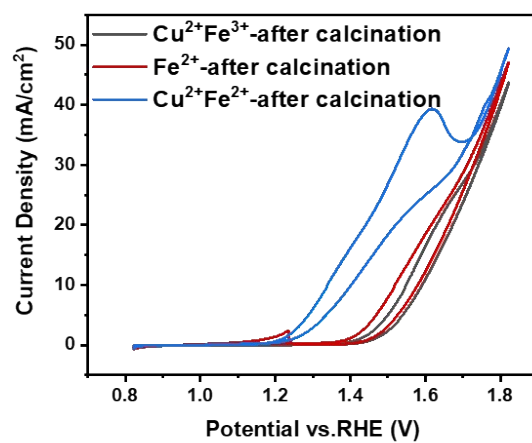

**Fig. S15** Comparison of benzyl alcohol oxidation performance of three catalysts.



**Table S1** The ICP data after the stability test.

| Dissolved Elements | Content (mg/L) |
|--------------------|----------------|
| Cu                 | 1.17           |
| Fe                 | 0.06           |

**Table S2** Activity and selectivity of different anode catalysts.

| Catalysts                               | Electrolyte                                                                        | Voltage/<br>Current, Time        | Conversion | Selectivity           | $\eta$<br>(10 mA·cm <sup>-2</sup> ) | Reference                                                |
|-----------------------------------------|------------------------------------------------------------------------------------|----------------------------------|------------|-----------------------|-------------------------------------|----------------------------------------------------------|
| CuFeO <sub>x</sub>                      | 1.0 M KOH + 0.1 M BA                                                               | 1.8 V, 120 min                   | 41.57%     | 99.9% (benzaldehyde)  | 1.29 V                              | This work                                                |
| Ni <sub>3</sub> Co <sub>1</sub> -LDH/NF | 1.5 M K <sub>2</sub> CO <sub>3</sub> +0.1M BA                                      | 1.6V, 180 min                    | 91%        | 58% (benzaldehyde)    | —                                   | Journal of Electroanalytical Chemistry 996 (2025) 119410 |
| PA-NF                                   | 1.0 M KOH + 1.0 mmol BA                                                            | 1.4 V, 120 min                   | 99.9%      | 88.3% (benzaldehyde)  | 1.31 V                              | ACS Catal. 2023, 13, 400-406                             |
| Commercial NF                           | 1.0 M KOH + 1.0 mmol BA                                                            | 1.4 V, 120 min                   | 9.6%       | 78.1% (benzaldehyde)  | 1.67 V                              | ACS Catal. 2023, 13, 400-406                             |
| Cu-LPOMs@PPAR                           | 0.25 mmol BA + 7 mg n-Bu <sub>4</sub> NBF <sub>4</sub> + 3.0 mL CH <sub>3</sub> CN | 3.0 V, 480 min                   | —          | 75% (benzaldehyde)    | —                                   | Molecules 2023, 28, 6460                                 |
| NiAl-LDH                                | 1.0 M KOH + 10 mM BA                                                               | 1.55 V —                         | 12%        | 38% (benzaldehyde)    | 1.81 V                              | Nanoscale, 2023, 15, 11867–11874                         |
| Au <sub>1+n</sub> -NiAl-LDH             | 1.0 M KOH + 10 mM BA                                                               | 1.55 V —                         | 32.5%      | 91% (benzaldehyde)    | 1.65 V                              | Nanoscale, 2023, 15, 11867–11874                         |
| Ru-NPs@NCNTs                            | 1.0 M KOH + 0.5 mmol BA                                                            | 1.60 V —                         | —          | 99.9% (benzaldehyde)  | 1.19 V                              | ACS Appl. Mater. Interfaces 2022, 14, 1452–1459          |
| CuO-NRs                                 | 1.0 M KOH + 10 mM BA                                                               | 1.35 V, 120 min                  | 90%        | 99% (benzaldehyde)    | 1.45 V                              | ACS Sustainable Chem. Eng. 2021, 9, 11855–11861          |
| Fe/Co200                                | 1.0M KOH + 15 mM BA                                                                | 20 mA·cm <sup>-2</sup> , 120 min | 25%        | 66.7% (benzaldehyde)  | 1.42 V                              | ACS Energy Lett. 2018, 3, 1854-1860                      |
| 0.2-WO-N/NF                             | 1.0 M KOH+0.1M BA                                                                  | 1.87 V, 240 min                  | 99.66%     | 99.74% (benzoic acid) | —                                   | Molecules 2024, 29, 3734.                                |
| FeCoNiAlMo/CNT                          | 1.0 M KOH + 0.2 M BA                                                               | 10 mA·cm <sup>-2</sup> , 720 min | 46%        | 92% (benzoic acid)    | 1.38 V                              | Adv. Funct. Mater. 2023, 2311611                         |
| NiFeO <sub>x</sub>                      | 1 M NaOH + 0.2 M BA                                                                | 25 mA·cm <sup>-2</sup> , 300 min | 99.2%      | 100% (benzoic acid)   | 1.41 V                              | Adv. Energy Mater. 2021, 11, 2101858                     |
| 1.0 h-Ni(OH) <sub>2</sub>               | 1.0 M KOH + 40 mM BA                                                               | 20 mA·cm <sup>-2</sup> , 132 min | 99.9%      | 99.3% (benzoic acid)  | 1.39 V                              | Green Chem., 2019, 21, 578-588                           |
| Mo-Ni/MnO <sub>2</sub> /NF              | 1.0 M KOH + 10 mM BA                                                               | 1.35 V, 240 min                  | 99%        | 99% (benzoic acid)    | 1.34 V                              | J. Mater. Chem. A, 2019, 7, 16501-16507                  |
| hp-Ni                                   | 1.0 M KOH + 10 mM BA                                                               | 1.423 V, 1080 min                | 99.0%      | 100% (benzoic acid)   | 1.35 V                              | ACS Catal., 2017, 7, 4564-4570                           |
